# Supplementary material for: First-principles study of the defect-activity and optical properties of FAPbCl3
Source: Royal Society of Chemistry journal article supplement (doi:10.1039/d2ma00087c), 2022-01-01
Supplement: d2ma00087c1.pdf [file d2ma00087c1.pdf]

## **First-principles study of the defect-activity and optical properties of FAPbCl<sub>3</sub>**

Sean Nations<sup>a</sup>, Lavrenty Gutsev<sup>a,b</sup>, Bala Ramachandran<sup>a</sup>, Sergey Aldoshin<sup>b</sup>, Yuhua Duan<sup>c</sup>,  
Shengnian Wang<sup>a\*</sup>

<sup>a</sup> *Institute for Micromanufacturing, Louisiana Tech University, Ruston, LA 71272, United States*

<sup>b</sup> *Institute of Problems of Chemical Physics of Russian Academy of Sciences, 1, Acad. Semenov  
Av., Chernogolovka, Moscow region, 142432 Russian Federation*

<sup>c</sup> *National Energy Technology Laboratory, United States Department of Energy, Pittsburgh,  
Pennsylvania 15236, USA*

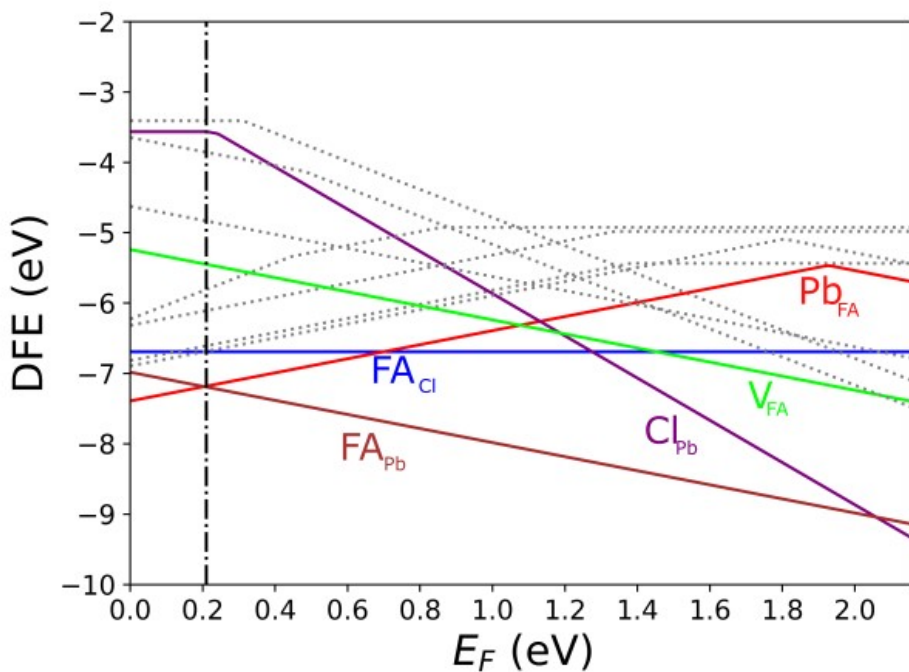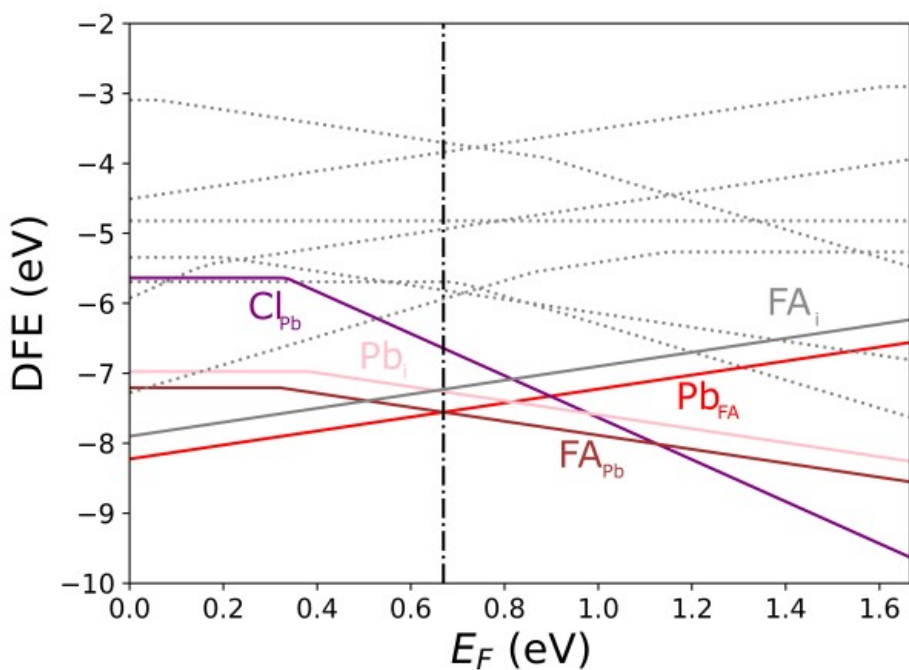

**Figure S1.** The calculated defect formation energy (DFE) as a function of the Fermi level for  $\text{FAPbCl}_3$ . The vertical dashed line indicates the value of the Fermi level caused by the defect pair that controls the pinning. a) PBE+D3 with intermediate potentials at 0 K. b) SCAN+D3 with intermediate potentials at 0 K.

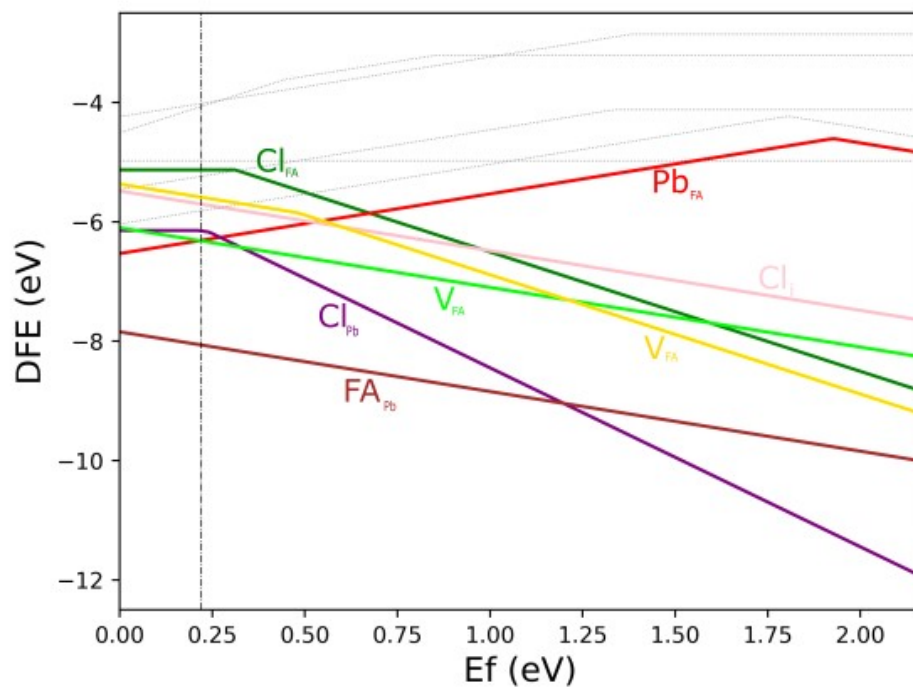

**Figure S2:** The PBE+D3 defect formation energy (DFE) for the Cl-rich case at 0 K as a function of the Fermi level for FAPbCl<sub>3</sub>. The vertical dashed line indicates the value of the Fermi level caused by the defect pair that controls the pinning.

## Optics:

The imaginary portion of the dielectric constant is obtained as a  $3 \times 3$  Cartesian tensor as follows:

$$\varepsilon_2^{\alpha\beta}(\omega) = \frac{4\pi^2 e^2}{\Omega} \lim_{q \rightarrow 0} \frac{1}{q^2} \sum_{c,v,k} 2\omega_k \delta(\varepsilon_{ck} - \varepsilon_{vk} - \omega) \times \langle u_{ck + \varepsilon_{\alpha} q} | u_{vk} \rangle \langle u_{vk} | u_{ck + \varepsilon_{\beta} q} \rangle \quad (\text{S1})$$

where the summation is over indices  $c$  (CB states),  $v$  (VB states), and  $k$  (k-points),  $e$  is elementary charge,  $\Omega$  is volume of the Brillouin zone,  $\omega_k$  is weight of the k-point vector,  $\varepsilon_{ck}$  and  $\varepsilon_{vk}$  are energy levels, and  $u_{ck}$  is the periodic portion of the orbital at k-point  $k$ . Vector  $e_{\alpha}$  is made of unit vectors for the Cartesian directions and  $\alpha/\beta$  refer to axis  $x$ ,  $y$ , and  $z$ . From the imaginary portion of the dielectric constant, the real part can be obtained by a Kramers-Kronig transformation:

$$\varepsilon_1^{\alpha\beta}(\omega) = 1 + \frac{2}{\pi} P \int_0^{\infty} \frac{\varepsilon_2^{\alpha\beta}(\omega') \omega'}{\omega'^2 - \omega^2} d\omega' \quad (\text{S2})$$

where  $P$  denotes the Cauchy principal value. As the dielectric tensor is diagonally dominate and with nearly identical diagonal elements,  $\varepsilon_1$  and  $\varepsilon_2$  are taken here to be the average of their three diagonal elements calculated via equations S1 and S2.

The real part of the optical conductivity ( $\sigma(\omega)$ ) is defined as

$$\sigma_1(\omega) = \text{Re}[\sigma(\omega)] = \frac{\omega}{4\pi} \varepsilon_2(\omega) \quad (\text{S3})$$

where  $\sigma(\omega)$  and  $\omega$  are in the cgs unit of  $\text{sec}^{-1}$ . The cgs conductivity is  $9 \times 10^{11}$  times larger than the

SI conductivity unit (Siemens/cm) which in the form of  $\sigma_1(\omega) = \frac{\varepsilon_2(\omega) \cdot \omega}{60}$  where  $\omega$  is in the unit of  $\text{cm}^{-1}$ . The corresponding imaginary part of  $\sigma(\omega)$  in SI unit is <sup>2</sup>

$$\sigma_2(\omega) = - \frac{\omega(\varepsilon_1(\omega) - 1)}{60} \quad (\text{S4})$$

The complex dielectric constant can be expressed as:

$$\varepsilon(\omega) = \varepsilon_1(\omega) + i\varepsilon_2(\omega) = \frac{4\pi i}{\omega}\sigma(\omega) = (\tilde{n} + ik)^2 \quad (5)$$

where  $\tilde{n}$  and  $k$  are the index of refraction and the extinction coefficient respectively, and can be evaluated by the calculated dielectric constants from equations (S1) and (S2).

$$\tilde{n} = \frac{1}{\sqrt{2}}(\varepsilon_1 + (\varepsilon_1^2 + \varepsilon_2^2)^{\frac{1}{2}})^{\frac{1}{2}} \quad (6)$$

$$\tilde{k} = \frac{1}{\sqrt{2}}(-\varepsilon_1 + (\varepsilon_1^2 + \varepsilon_2^2)^{\frac{1}{2}})^{\frac{1}{2}} \quad (7)$$

In the case of normal incidence, the reflectivity  $R$  and the absorption coefficient  $\alpha$  ( $\text{sec}^{-1}$  in cgs unit) in terms of  $\tilde{n}$  and  $k$  are defined as <sup>2</sup>

$$R = \frac{(\tilde{n} - 1)^2 + k^2}{(\tilde{n} + 1)^2 + k^2} \quad (8)$$

$$\alpha = \frac{2\omega k}{c} \quad (9)$$

In SI unit,  $\omega$  and  $\alpha$  are in  $\text{cm}^{-1}$ ,  $\alpha = 4\pi\omega k$ . In all cases, both the low frequency region  $\omega\tau \ll 1$  ( $\tau$  is the relaxation time) and the high frequency region  $\omega\tau \gg 1$  are extensively studied to analyze the exact ground state of the material as these two regions carry the signatures of two distinct mechanisms associated with optical conductivity within a solid. While the low frequency region is dominated by free carriers which are in abundance in a metal, the high frequency region is dominated by inter-band electronic transitions typical of a dielectric material. As in the limit  $\omega\tau \ll 1$ , both  $\tilde{n}$  and  $k$  become sufficiently large, for example, in a metallic conductor,

$$R = 1 - \frac{2}{\tilde{n}} \rightarrow 1 \quad (10)$$

which means that the conductor is characterized by its behavior as a perfect reflector with an exceedingly large absorption coefficient in the low frequency region.

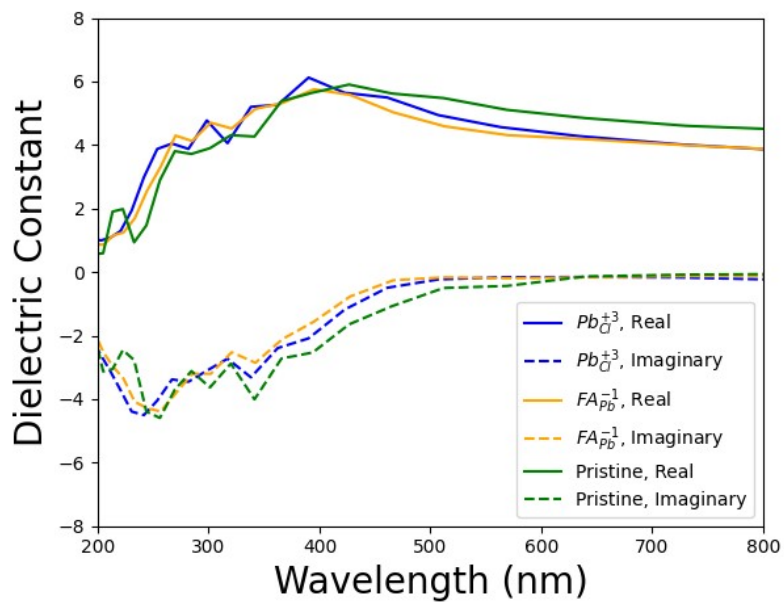

(a)

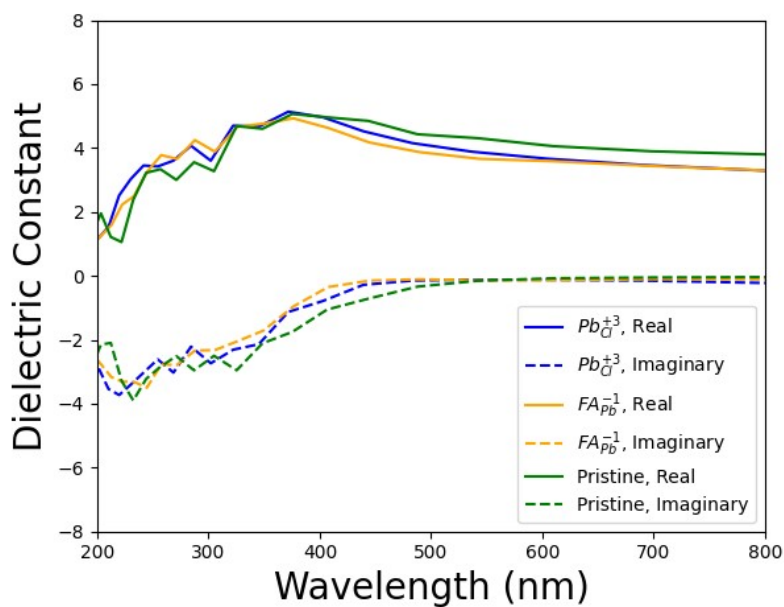

(b)

**Figure S3.** The complex dielectric constant for (a) PBE+D3 and (b) SCAN+D3 with the real portion plotted regularly and the imaginary portion plotted on the negative y-axis.

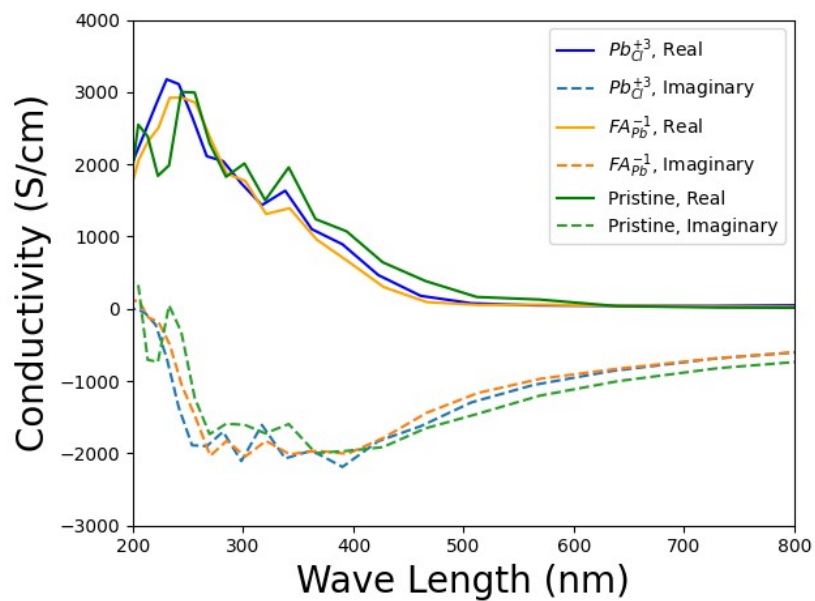

(a)

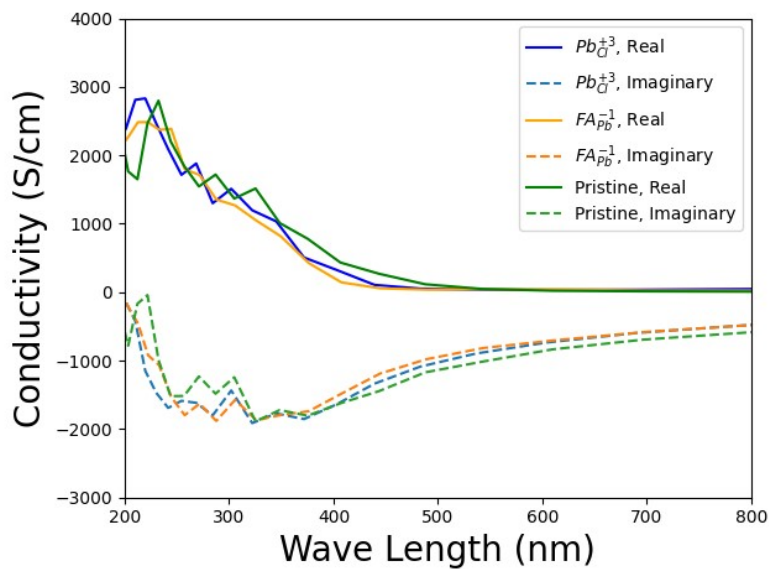

(b)

**Figure S4.** The complex conductivity for (a) PBE+D3 and (b) SCAN+D3.

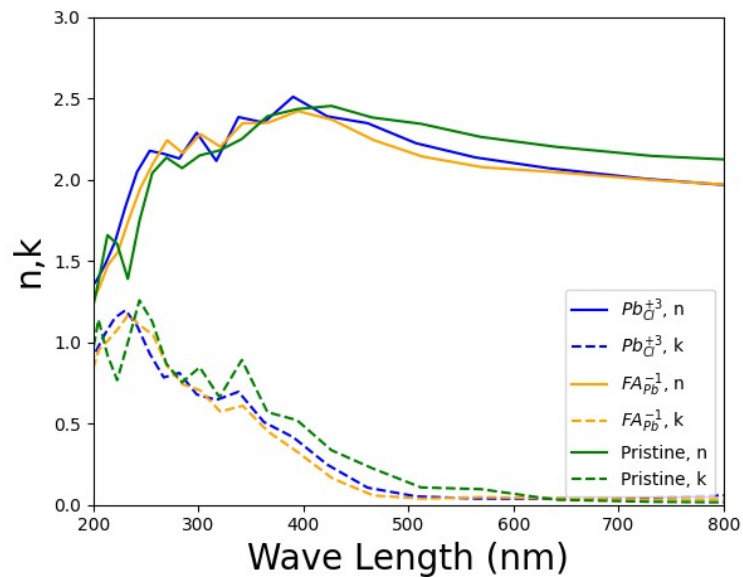

(a)

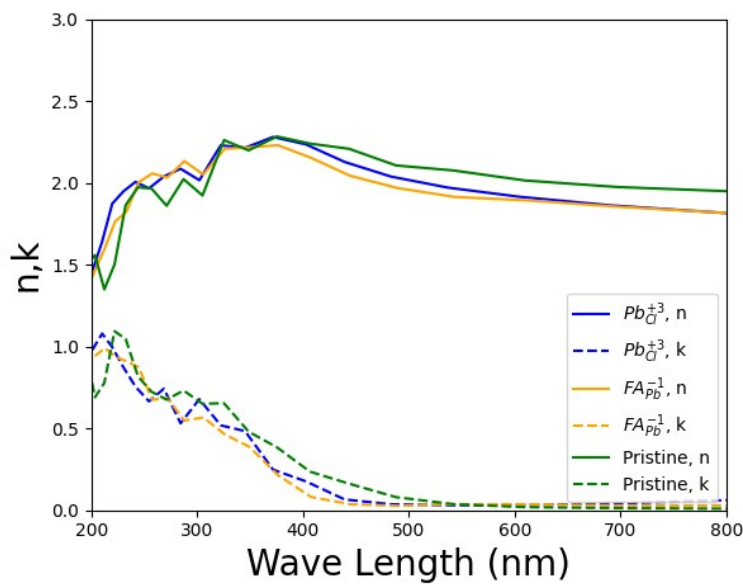

(b)

**Figure S5.** The refractive index (n) and extinction coefficient (k) for (a) PBE+D3 and (b) SCAN+D3.



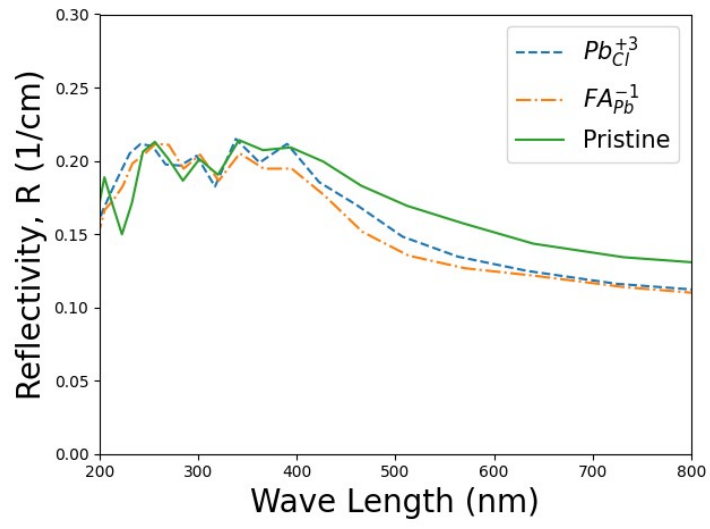

(a)

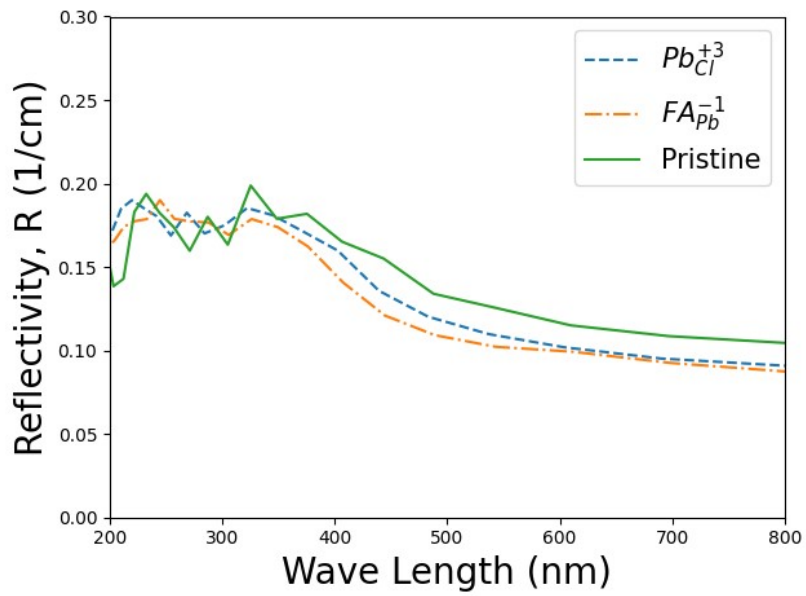

(b)

**Figure S6.** The reflectivity for (a) PBE+D3 and (b) SCAN+D3.

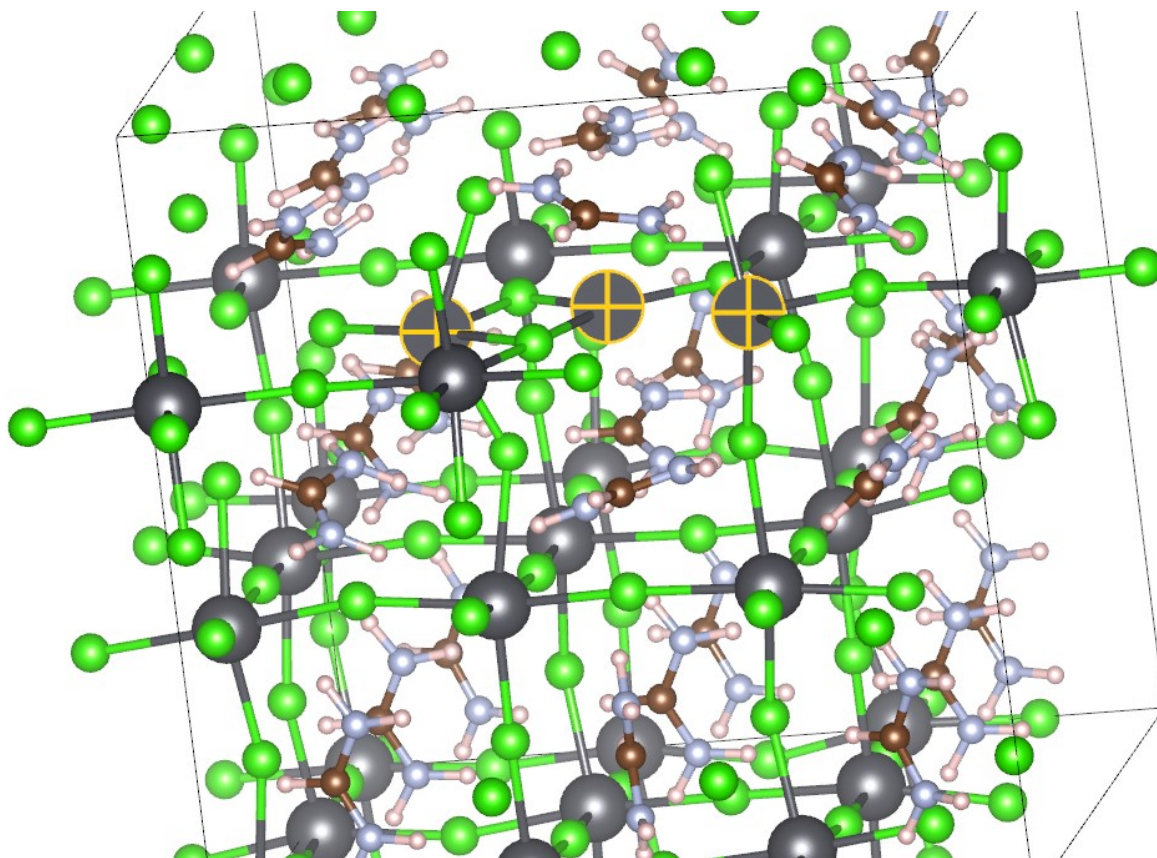

**Figure S7.** The local geometry of the  $\text{Pb}_{\text{Cl}}$  defect

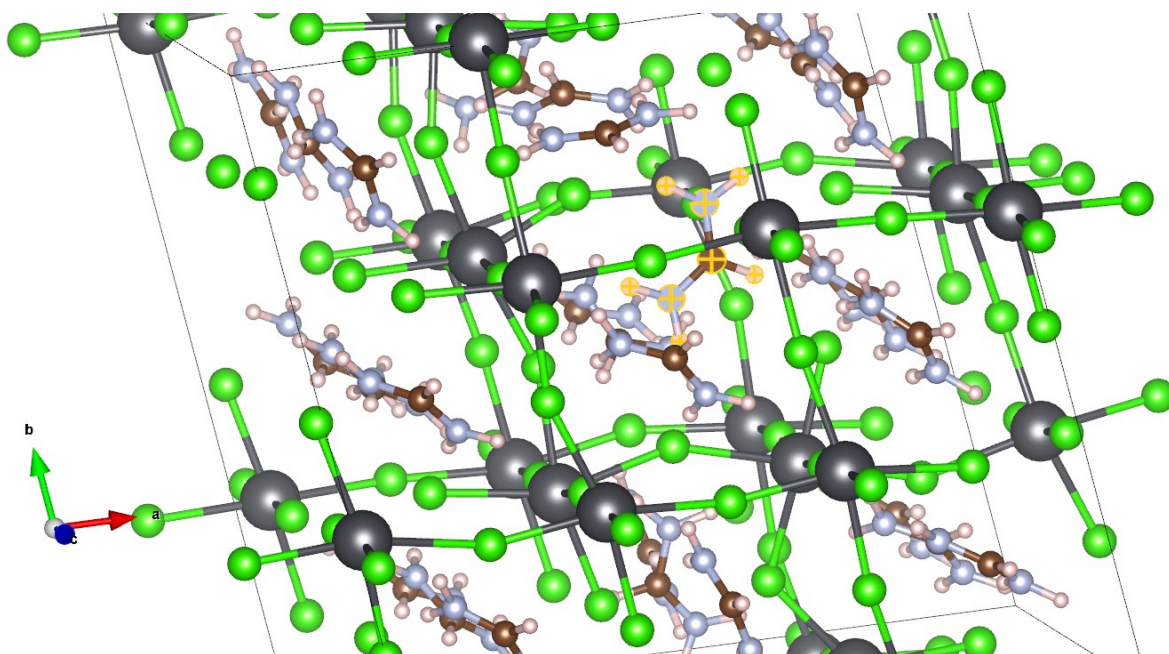

**Figure S8.** The local geometry of the  $\text{FA}_{\text{Pb}}$  defect

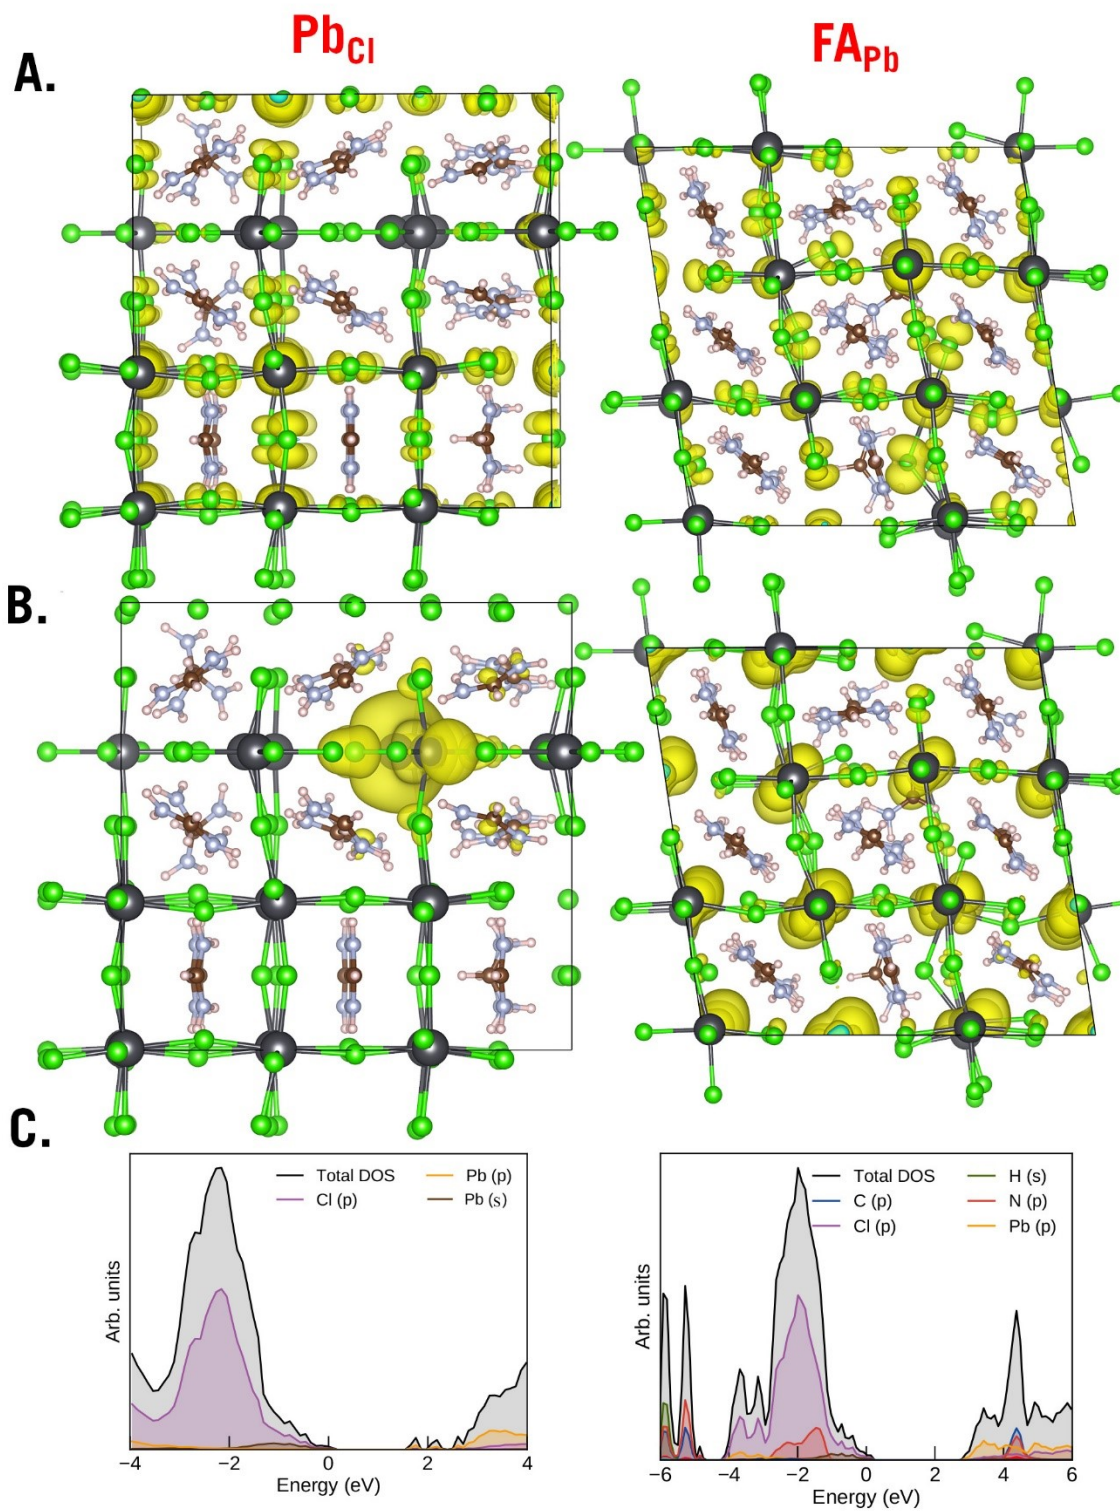

**Figure S9.** SCAN+D3 plots of A. HOMO, B. LUMO and C. DOS of the Pb<sub>Cl</sub> and FA<sub>Pb</sub> defects
